# Supplementary material for: Rubidium vanadium(iii) vanadyl(iv) phosphate, Rb3V3+(V4+O)(PO4)(H0.5PO4)2: crystal chemistry and low-dimensional magnetism
Source: Royal Society of Chemistry journal article supplement (doi:10.1039/d4dt02719a), 2024-11-21
Supplement: d4dt02719a1.pdf [file d4dt02719a1.pdf]

## SUPPLEMENTARY INFORMATION

### Rubidium vanadium(III) vanadyl(IV) phosphate, $\text{Rb}_3\text{V}^{3+}(\text{V}^{4+}\text{O})(\text{PO}_4)(\text{H}_{0.5}\text{PO}_4)_2$ : crystal chemistry and low- dimensional magnetism

Olga Yakubovich,<sup>\*a</sup> Galina Kiriukhina,<sup>a,b</sup> Anatoliy Volkov,<sup>c</sup> Olga Dimitrova,<sup>a</sup> Ratibor Chumakov,<sup>d</sup> Larisa Shvanskaya,<sup>a,e</sup> and Alexander Vasiliev<sup>\*a,e</sup>

<sup>a</sup>Lomonosov Moscow State University, Moscow 119991.

<sup>b</sup>Korzhinskii Institute of Experimental Mineralogy RAS, 142432 Chernogolovka, Russia.

<sup>c</sup>Skolkovo Institute of Science and Technology, Moscow 121205, Russia.

<sup>d</sup>National Research Centre "Kurchatov Institute", Moscow 123182, Russia

<sup>e</sup>National University of Science and Technology MISIS, Moscow 119049, Russia

\*corresponding authors: yakubovich.olga320@gmail.com, anvas2000@yahoo.com

#### 1. X-Ray diffraction data

**Table S1.**  $\text{Rb}_3\text{V}^{3+}(\text{V}^{4+}\text{O})(\text{PO}_4)(\text{H}_{0.5}\text{PO}_4)_2$ . Selected geometric parameters (Å)

|                         |            |                      |            |
|-------------------------|------------|----------------------|------------|
| Rb1—O19 <sup>i</sup>    | 2.876 (14) | Rb6—O9               | 3.591 (13) |
| Rb1—O21 <sup>i</sup>    | 2.899 (13) | Rb6—O25              | 3.636 (14) |
| Rb1—O22                 | 2.940 (12) | V1—O17               | 1.973 (13) |
| Rb1—O12                 | 2.994 (13) | V1—O9 <sup>iii</sup> | 1.976 (12) |
| Rb1—O6 <sup>i</sup>     | 3.036 (12) | V1—O12 <sup>x</sup>  | 1.983 (13) |
| Rb1—O4 <sup>i</sup>     | 3.070 (13) | V1—O5 <sup>xii</sup> | 2.010 (13) |
| Rb1—O9 <sup>ii</sup>    | 3.129 (12) | V1—O26 <sup>x</sup>  | 2.079 (12) |
| Rb1—O15                 | 3.131 (13) | V1—O15 <sup>x</sup>  | 2.097 (12) |
| Rb2—O23 <sup>iii</sup>  | 2.947 (13) | V2—O14               | 1.976 (12) |
| Rb2—O13 <sup>iv</sup>   | 2.959 (13) | V2—O1                | 1.982 (13) |
| Rb2—O16 <sup>v</sup>    | 2.967 (13) | V2—O4 <sup>iv</sup>  | 2.003 (13) |
| Rb2—O26 <sup>vi</sup>   | 2.975 (12) | V2—O7 <sup>iv</sup>  | 2.030 (13) |
| Rb2—O3                  | 2.977 (12) | V2—O6 <sup>iv</sup>  | 2.057 (12) |
| Rb2—O5 <sup>v</sup>     | 2.977 (13) | V2—O13 <sup>iv</sup> | 2.082 (12) |
| Rb2—O1                  | 3.004 (13) | V3—O22               | 1.588 (13) |
| Rb2—O20 <sup>vii</sup>  | 3.177 (14) | V3—O10               | 1.931 (12) |
| Rb3—O16                 | 2.836 (12) | V3—O3                | 1.946 (11) |
| Rb3—O8 <sup>viii</sup>  | 2.967 (12) | V3—O18               | 1.969 (12) |
| Rb3—O23 <sup>viii</sup> | 3.004 (13) | V3—O11 <sup>iv</sup> | 2.000 (12) |
| Rb3—O13 <sup>viii</sup> | 3.048 (12) | V4—O23               | 1.618 (12) |
| Rb3—O17 <sup>vii</sup>  | 3.053 (12) | V4—O24               | 1.923 (14) |

|                        |            |                      |            |
|------------------------|------------|----------------------|------------|
| Rb3—O23 <sup>ix</sup>  | 3.067 (13) | V4—O25 <sup>xi</sup> | 1.937 (13) |
| Rb3—O10 <sup>vii</sup> | 3.138 (12) | V4—O8                | 1.982 (13) |
| Rb4—O14                | 2.855 (13) | V4—O2 <sup>ix</sup>  | 1.984 (12) |
| Rb4—O20 <sup>vii</sup> | 2.889 (12) | P1—O3                | 1.506 (12) |
| Rb4—O6                 | 2.962 (12) | P1—O7                | 1.521 (13) |
| Rb4—O22 <sup>iv</sup>  | 2.978 (12) | P1—O1                | 1.525 (12) |
| Rb4—O1                 | 3.039 (13) | P1—O19               | 1.545 (13) |
| Rb4—O11 <sup>ix</sup>  | 3.212 (12) | P2—O4                | 1.526 (13) |
| Rb4—O2                 | 3.247 (13) | P2—O9                | 1.533 (12) |
| Rb4—O24 <sup>ix</sup>  | 3.252 (13) | P2—O8                | 1.535 (13) |
| Rb4—O7 <sup>iv</sup>   | 3.301 (13) | P2—O21               | 1.565 (12) |
| Rb5—O19 <sup>vi</sup>  | 2.957 (12) | P3—O17               | 1.512 (13) |
| Rb5—O26                | 2.980 (13) | P3—O10               | 1.517 (12) |
| Rb5—O8 <sup>iii</sup>  | 3.067 (13) | P3—O20               | 1.529 (13) |
| Rb5—O25 <sup>vi</sup>  | 3.081 (13) | P3—O12               | 1.532 (13) |
| Rb5—O9 <sup>iii</sup>  | 3.150 (13) | P4—O2                | 1.501 (12) |
| Rb5—O17                | 3.163 (14) | P4—O5                | 1.513 (13) |
| Rb5—O18 <sup>vi</sup>  | 3.181 (12) | P4—O14               | 1.523 (13) |
| Rb5—O12 <sup>x</sup>   | 3.229 (12) | P4—O16               | 1.532 (12) |
| Rb5—O10                | 3.282 (12) | P5—O11               | 1.525 (12) |
| Rb6—O7                 | 2.837 (12) | P5—O6                | 1.534 (13) |
| Rb6—O21 <sup>xi</sup>  | 2.922 (13) | P5—O13               | 1.548 (13) |
| Rb6—O15 <sup>ii</sup>  | 3.034 (12) | P5—O24               | 1.554 (13) |
| Rb6—O4                 | 3.041 (13) | P6—O25               | 1.520 (13) |
| Rb6—O14 <sup>iv</sup>  | 3.214 (12) | P6—O18               | 1.525 (12) |
| Rb6—O2 <sup>iv</sup>   | 3.313 (12) | P6—O15               | 1.528 (13) |
| Rb6—O18                | 3.441 (13) | P6—O26               | 1.538 (13) |
| Rb6—O22                | 3.505 (13) |                      |            |

Symmetry code(s): (i)  $x+1, y, z$ ; (ii)  $-x+1, -y+2, -z+1$ ; (iii)  $x+1, y, z+1$ ; (iv)  $-x, -y+1, -z+1$ ; (v)  $-x, -y+1, -z+2$ ; (vi)  $-x+1, -y+2, -z+2$ ; (vii)  $x-1, y, z$ ; (viii)  $x, y, z+1$ ; (ix)  $-x-1, -y+1, -z+1$ ; (x)  $-x+2, -y+2, -z+2$ ; (xi)  $-x, -y+2, -z+1$ ; (xii)  $-x+1, -y+1, -z+2$ .

**Table S2.**  $\text{Rb}_3\text{V}^{3+}(\text{V}^{4+}\text{O})(\text{PO}_4)(\text{H}_{0.5}\text{PO}_4)_2$ . Bond valence data

| Atom     | P1   | P2   | P3   | P4   | P5   | P6   | V1   | V2   | V3   | V4   | Rb1  | Rb2  | Rb3       | Rb4  | Rb5  | Rb6  | $\Sigma$    |
|----------|------|------|------|------|------|------|------|------|------|------|------|------|-----------|------|------|------|-------------|
| O1       | 1.28 |      |      |      |      |      |      | 0.58 |      |      |      | 0.13 |           | 0.12 |      |      | 2.11        |
| O2       |      |      |      | 1.37 |      |      |      |      |      | 0.58 |      |      |           | 0.07 |      | 0.06 | 2.08        |
| O3       | 1.35 |      |      |      |      |      |      |      | 0.65 |      |      | 0.15 |           |      |      |      | 2.15        |
| O4       |      | 1.28 |      |      |      |      |      | 0.49 |      |      | 0.11 |      |           |      |      | 0.12 | 2.00        |
| O5       |      |      |      | 1.32 |      |      | 0.49 |      |      |      |      | 0.15 |           |      |      |      | 1.96        |
| O6       |      |      |      |      | 1.25 |      |      | 0.43 |      |      | 0.12 |      |           | 0.15 |      |      | 1.95        |
| O7       | 1.30 |      |      |      |      |      |      | 0.46 |      |      |      |      |           | 0.06 |      | 0.21 | 2.03        |
| O8       |      | 1.25 |      |      |      |      |      |      |      | 0.59 |      |      | 0.15      |      | 0.11 |      | 2.10        |
| O9       |      | 1.26 |      |      |      |      | 0.53 |      |      |      | 0.10 |      |           |      | 0.09 | 0.03 | 2.01        |
| O10      |      |      | 1.31 |      |      |      |      |      | 0.67 |      |      |      | 0.09      |      | 0.06 |      | 2.13        |
| O11      |      |      |      |      | 1.28 |      |      |      | 0.56 |      |      |      |           | 0.08 |      |      | 1.92        |
| O12      |      |      | 1.25 |      |      |      | 0.52 |      |      |      | 0.14 |      |           |      | 0.07 |      | 1.98        |
| O13      |      |      |      |      | 1.21 |      |      | 0.40 |      |      |      | 0.15 | 0.12      |      |      |      | 1.88        |
| O14      |      |      |      | 1.29 |      |      |      | 0.63 |      |      |      |      |           | 0.20 |      | 0.08 | 2.20        |
| O15      |      |      |      |      |      | 1.27 | 0.38 |      |      |      | 0.09 |      |           |      |      | 0.13 | 1.87        |
| O16/OH   |      |      |      | 1.25 |      |      |      |      |      |      |      | 0.15 | 0.21      |      |      |      | <b>1.61</b> |
| O17      |      |      | 1.33 |      |      |      | 0.54 |      |      |      |      |      | 0.12      |      | 0.09 |      | 2.08        |
| O18      |      |      |      |      |      | 1.28 |      |      | 0.60 |      |      |      |           |      | 0.08 | 0.04 | 2.00        |
| O19/OH   | 1.21 |      |      |      |      |      |      |      |      |      | 0.19 |      |           |      | 0.15 |      | <b>1.55</b> |
| O20/OH   |      |      | 1.26 |      |      |      |      |      |      |      |      | 0.08 |           | 0.18 |      |      | <b>1.52</b> |
| O21/OH   |      | 1.15 |      |      |      |      |      |      |      |      | 0.18 |      |           |      |      | 0.17 | <b>1.50</b> |
| O22      |      |      |      |      |      |      |      |      | 1.70 |      | 0.16 |      |           | 0.14 |      | 0.04 | 2.04        |
| O23      |      |      |      |      |      |      |      |      |      | 1.56 |      | 0.16 | 0.11;0.14 |      |      |      | 1.97        |
| O24      |      |      |      |      | 1.18 |      |      |      |      | 0.69 |      |      |           | 0.07 |      |      | 1.94        |
| O25      |      |      |      |      |      | 1.30 |      |      |      | 0.66 |      |      |           |      | 0.11 | 0.02 | 2.09        |
| O26      |      |      |      |      |      | 1.24 | 0.40 |      |      |      |      | 0.14 |           |      | 0.14 |      | 1.92        |
| $\Sigma$ | 5.14 | 4.94 | 5.15 | 5.20 | 4.92 | 5.09 | 2.86 | 2.99 | 4.18 | 4.08 | 1.08 | 1.11 | 0.94      | 1.07 | 0.90 | 0.90 |             |

## 1. XPS - data

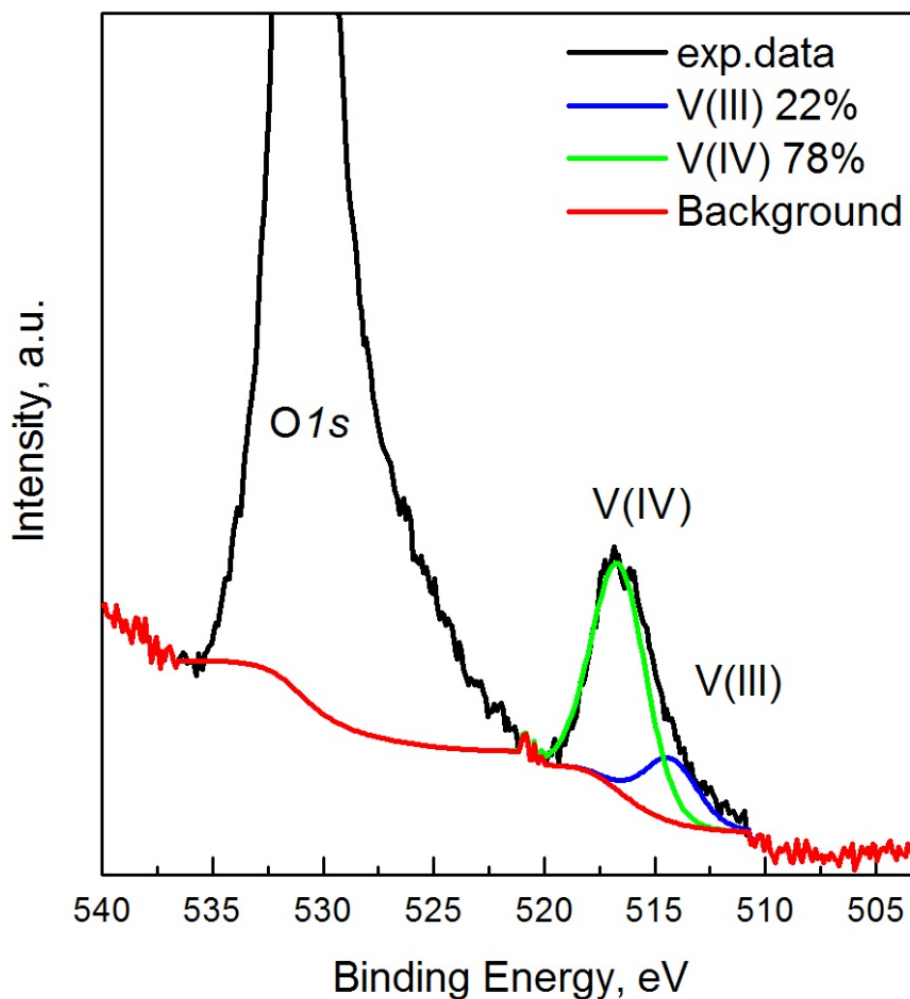

**Figure S1.** V 2p (and O 1s) spectra of  $\text{Rb}_3\text{V}^{3+}(\text{V}^{4+}\text{O})(\text{PO}_4)(\text{H}_{0.5}\text{PO}_4)_2$ .

As can be seen from Fig. S1, the vanadium spectrum in  $\text{Rb}_3\text{V}^{3+}(\text{V}^{4+}\text{O})(\text{PO}_4)(\text{H}_{0.5}\text{PO}_4)_2$  contains two peaks corresponding to V(III) and V(IV). The vanadium ions' concentrations differ from the bulk value, which is a standard feature of the XPS method, where the analysis depth is limited to 10 nm, and the sample surface tends to be further oxidized under atmospheric conditions. Thus, XPS study confirmed the presence of vanadium ions in 3+ and 4+ oxidation states.

## 2. FTIR spectroscopy

The FTIR spectrum (Fig. S2) shows a complex spectral profile with a series of overlapping bands. Two broad band systems are present in the range of about  $3300\text{ cm}^{-1}$ , from  $1400$  to  $700\text{ cm}^{-1}$  and a third band system from  $650$  to  $500\text{ cm}^{-1}$ .

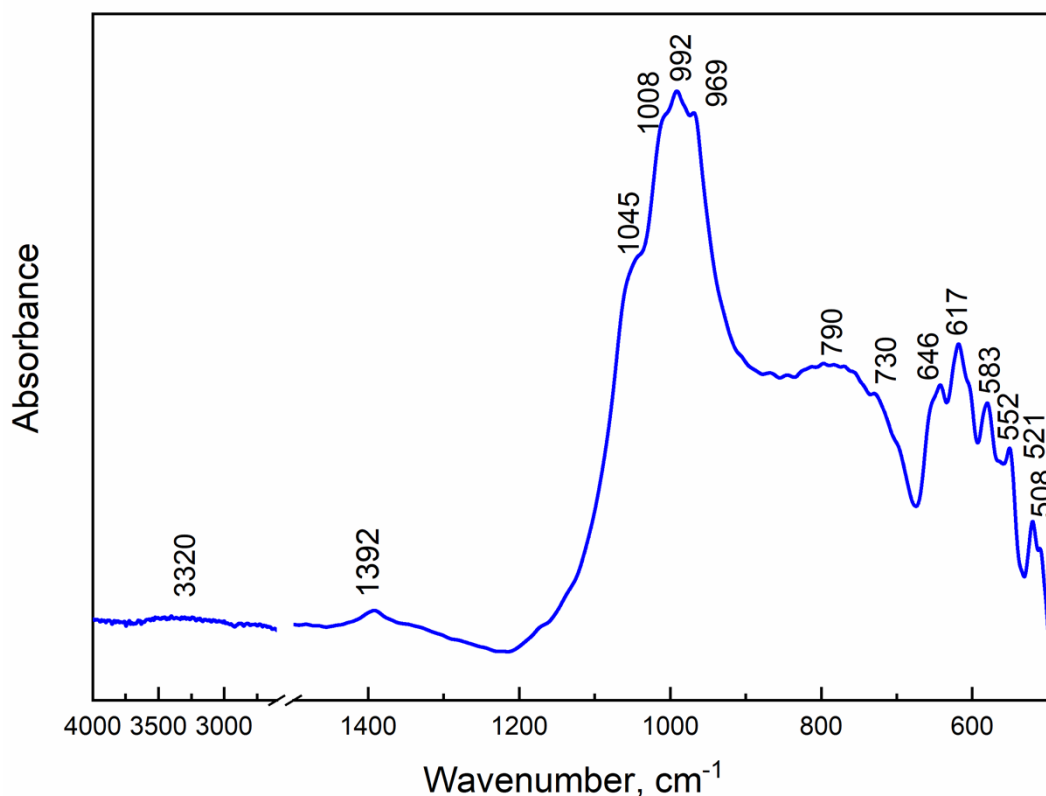

Fig. S2. FTIR spectrum of  $\text{Rb}_3\text{V}^{3+}(\text{V}^{4+}\text{O})(\text{PO}_4)(\text{H}_{0.5}\text{PO}_4)_2$ .

As shown in Fig. S2, in the region of stretching vibrations of OH groups,  $3000\text{--}3500\text{ cm}^{-1}$ , there is a broad weak band at  $3320\text{ cm}^{-1}$  in  $\text{Rb}_3\text{V}^{3+}(\text{V}^{4+}\text{O})(\text{PO}_4)(\text{H}_{0.5}\text{PO}_4)_2$ . The low intensity of this band and its broadening can be attributed to the statistical character and the low amount of H atoms taking in account the similar energies of hydrogen bonds.

The second wide region, from  $1400$  to  $700\text{ cm}^{-1}$ , features weak absorption band at  $1392\text{ cm}^{-1}$ . This band is typical of stretching vibrations of OH groups with a low degree of O-H bond covalence as in the case of acid salts.<sup>1</sup> Recently, it was established, that if the  $\text{VO}^{2+}$  group is coordinated by phosphates, the value of the typical  $\text{V}=\text{O}$  stretching motion is found at about  $990\text{ cm}^{-1}$ . Thus the strongest intensity band at  $992\text{ cm}^{-1}$  is assigned to the symmetric vibrations of the short terminal  $\text{V}=\text{O}$  bond in  $\text{Rb}_3\text{V}^{3+}(\text{V}^{4+}\text{O})(\text{PO}_4)(\text{H}_{0.5}\text{PO}_4)_2$ . However, this band can be overlapping to the mode of symmetric stretching vibration of  $\text{PO}_4$  group.<sup>3</sup> The band at  $969\text{ cm}^{-1}$  could correspond to antisymmetric vibrations of the  $\text{V}=\text{O}$  bond. Antisymmetric stretching vibrations of  $\text{PO}_4$  tetrahedra appear at  $1045$  and  $1008\text{ cm}^{-1}$ . The broad band with the maximum at  $790$  and the shoulder at  $730\text{ cm}^{-1}$  are assigned to asymmetrical stretching vibrations of  $\text{V}-\text{O}-\text{V}$  bond according.<sup>4-6</sup> The third  $650$  to  $500\text{ cm}^{-1}$  region includes medium intensity bands, which are typical for antisymmetric bending mode of  $\text{PO}_4$  groups.<sup>3</sup>

1. N. V. Chukanov, A. D. Chervonnyi, *Infrared Spectroscopy of Minerals and Related Compounds*. Springer Mineralogy. 2016. doi:10.1007/978-3-319-25349-7).
2. E. J. Baran, *J. Coord. Chem.*, 2001, **54**, 215.
3. Sh. Kharbish, Y. A. Sharaby, *J Raman Spectrosc.*, 2021;1–9. <https://doi.org/10.1002/jrs.6100>.
4. W. P. Griffith, T. D. Wickins, *J. Chem. Soc. A*, 1966, **0**, 1087. <https://doi.org/10.1039/J19660001087>
5. R. L. Frost, S. J. Palmer, J. Cejka, J. Sejkora, J. Plasil, S. Bahfenne and E. C. Keeffe, *J. Raman Spectrosc.*, 2011, **42**, 1701.
6. P. Schwendt and D. Joniakova, *Chem. Zvesti*, 1975, **29**, 381.
